# Supplementary material
Source: PubMed Central journal article supplement (PMC6395923)
Supplement: AAC.02373-18-s0001.pdf [file AAC.02373-18-s0001.pdf]

**Fig. S1. Dose-response curves (fasciocidal activity) for compounds shown in Table 3.**  
Data were normalized (% control) as a percentage of the controls (no drug added).  
Results obtained from triplicated assays.

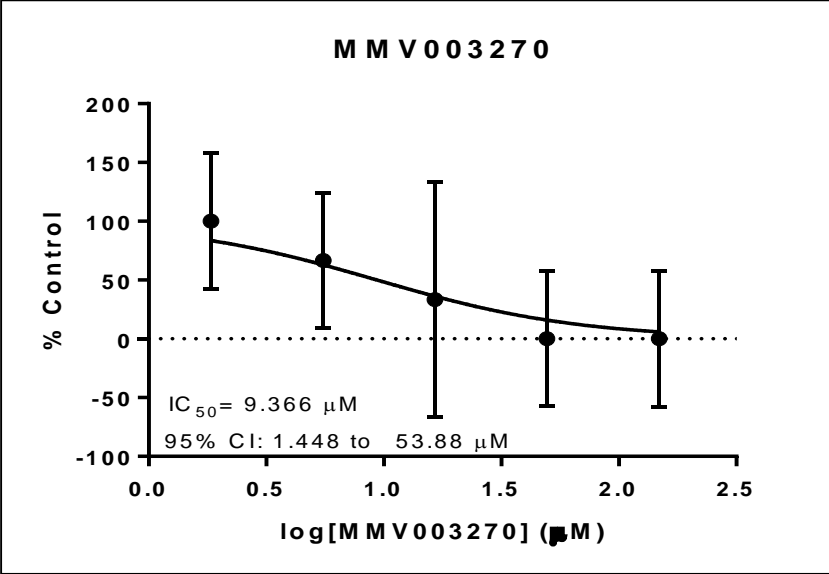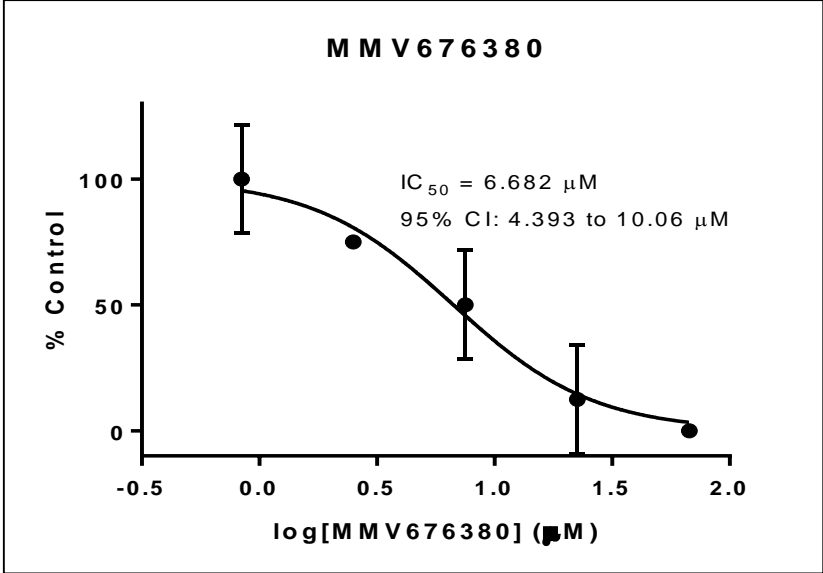

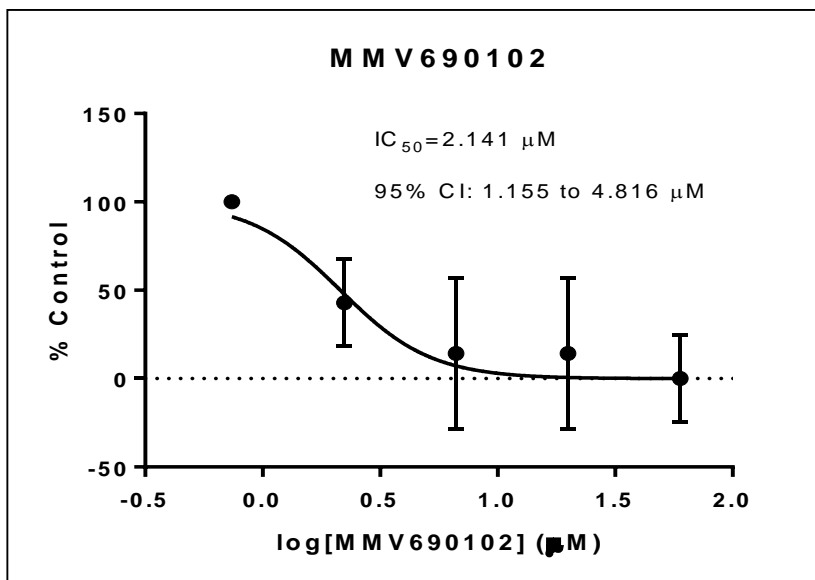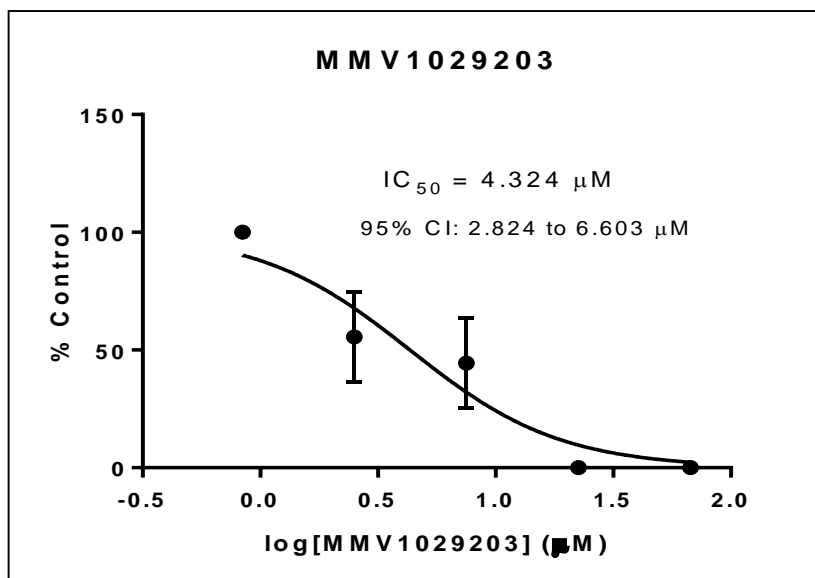

**Table S1. Sigmoidal Dose-Response Analysis Data.**  
**The Pathogen Box compounds hit *Fasciola hepatica*.**

**MMV676380**

log(inhibitor) vs. normalized response -- Variable slope

Best-fit values

LogIC50 0.8249

HillSlope -1.458

IC50 6.682

Std. Error

LogIC50 0.08178

HillSlope 0.3597

95% CI (profile likelihood)

LogIC50 0.6428 to 1.003

HillSlope -2.702 to -0.9179

IC50 4.393 to 10.06

Goodness of Fit

Degrees of Freedom 13

R square 0.871

Absolute Sum of Squares 3072

Sy.x 15.37

Number of points

# of X values 15

# Y values analyzed 15

**MMV1029203**

log(inhibitor) vs. normalized response -- Variable slope

Best-fit values

LogIC50 0.6359

HillSlope -1.36

IC50 4.324

Std. Error

LogIC50 0.08345

HillSlope 0.3208

95% CI (profile likelihood)

LogIC50 0.4509 to 0.8198

HillSlope -2.094 to -0.893

IC50 2.824 to 6.603

Goodness of Fit

Degrees of Freedom 13

R square 0.8695

Absolute Sum of Squares 2957

Sy.x 15.08

|                     |    |
|---------------------|----|
| Number of points    |    |
| # of X values       | 15 |
| # Y values analyzed | 15 |

**MMV003270**

log(inhibitor) vs. normalized response

Best-fit values

|         |        |
|---------|--------|
| LogIC50 | 0.9716 |
|---------|--------|

|      |       |
|------|-------|
| IC50 | 9.366 |
|------|-------|

Std. Error

|         |        |
|---------|--------|
| LogIC50 | 0.3838 |
|---------|--------|

95% CI (profile likelihood)

|         |                 |
|---------|-----------------|
| LogIC50 | 0.1607 to 1.731 |
|---------|-----------------|

|      |                |
|------|----------------|
| IC50 | 1.448 to 53.88 |
|------|----------------|

Goodness of Fit

|                    |    |
|--------------------|----|
| Degrees of Freedom | 14 |
|--------------------|----|

|          |        |
|----------|--------|
| R square | 0.3016 |
|----------|--------|

|                         |       |
|-------------------------|-------|
| Absolute Sum of Squares | 48446 |
|-------------------------|-------|

|      |       |
|------|-------|
| Sy.x | 58.83 |
|------|-------|

Number of points

|               |    |
|---------------|----|
| # of X values | 15 |
|---------------|----|

|                     |    |
|---------------------|----|
| # Y values analyzed | 15 |
|---------------------|----|

**MMV690102**

log(inhibitor) vs. normalized response -- Variable slope

Best-fit values

|         |        |
|---------|--------|
| LogIC50 | 0.3305 |
|---------|--------|

|           |       |
|-----------|-------|
| HillSlope | -2.25 |
|-----------|-------|

|      |       |
|------|-------|
| IC50 | 2.141 |
|------|-------|

Std. Error

|         |        |
|---------|--------|
| LogIC50 | 0.1192 |
|---------|--------|

|           |       |
|-----------|-------|
| HillSlope | 1.473 |
|-----------|-------|

95% CI (profile likelihood)

|         |                   |
|---------|-------------------|
| LogIC50 | 0.06248 to 0.6827 |
|---------|-------------------|

|           |                |
|-----------|----------------|
| HillSlope | ??? to -0.6474 |
|-----------|----------------|

|      |                |
|------|----------------|
| IC50 | 1.155 to 4.816 |
|------|----------------|

Goodness of Fit

|                    |    |
|--------------------|----|
| Degrees of Freedom | 13 |
|--------------------|----|

|          |        |
|----------|--------|
| R square | 0.6268 |
|----------|--------|

|                         |       |
|-------------------------|-------|
| Absolute Sum of Squares | 10785 |
|-------------------------|-------|

|      |      |
|------|------|
| Sy.x | 28.8 |
|------|------|

Number of points

|               |    |
|---------------|----|
| # of X values | 15 |
|---------------|----|

# Y values analyzed

15
